# Supplementary material for: Effect of Digested Selected Food Items on Markers of Oxidative Stress and Inflammation in a Caco-2-Based Human Gut Epithelial Model
Source: MDPI journal article supplement (doi:10.3390/antiox13020150), 2024-01-25
Supplement: s1 [file s1]

**Supplementary Table 1.** Standard dilution series for F2- isoprostane analysis.

| Number | V (ELISA buffer) (μL) | V (standard) (μL) | concentration (pg/mL) |
|--------|-----------------------|-------------------|-----------------------|
| 1      | 900                   | 100 (5 ng/ml)     | 500                   |
| 2      | 750                   | 500 std 1         | 200                   |
| 3      | 750                   | 500 std 2         | 80                    |
| 4      | 750                   | 500 std 3         | 32                    |
| 5      | 750                   | 500 std 4         | 12.8                  |
| 6      | 750                   | 500 std 5         | 5.1                   |
| 7      | 750                   | 500 std 6         | 2                     |
| 8      | 750                   | 500 std 7         | 0.8                   |

**Supplementary Table 2.** Standard dilutions for the ABTS assay. Starting standard concentration was 10 mg/mL.

| Standards | Dilution | Volume ascorbic acid stock solution (μL) | Volume deionized H <sub>2</sub> O (μL) | Concentration (mg/mL) |
|-----------|----------|------------------------------------------|----------------------------------------|-----------------------|
| 1         | /        | /                                        | 1000                                   | 0                     |
| 2         | 1:200    | 5                                        | 995                                    | 0,05                  |
| 3         | 1:100    | 10                                       | 990                                    | 0,1                   |
| 4         | 1:50     | 20                                       | 980                                    | 0,2                   |
| 5         | 1:33,33  | 30                                       | 970                                    | 0,3                   |
| 6         | 1:25     | 40                                       | 960                                    | 0,4                   |
| 7         | 1:20     | 50                                       | 950                                    | 0,5                   |

**Supplementary Table 3.** Standard dilutions for the FRAP assay. Starting concentration was 2535 mg/L.

| Standard   | Dilution | Volume stock (μL) | Distilled water (μL) | Concentration (mg/L) |
|------------|----------|-------------------|----------------------|----------------------|
| Blank      | /        | 0                 | 1000                 | 0                    |
| Standard 1 | 1:400    | 2.5               | 997.5                | 6.34                 |
| Standard 2 | 1:200    | 5                 | 995                  | 12.68                |
| Standard 3 | 1:133.33 | 7.5               | 992.5                | 19.02                |
| Standard 4 | 1:100    | 10                | 990                  | 25.35                |
| Standard 5 | 1:66.66  | 15                | 985                  | 38.03                |
| Standard 6 | 1:50     | 20                | 980                  | 50.7                 |
| Standard 7 | 1:33.33  | 30                | 970                  | 76.06                |
| Standard 8 | 1:25     | 40                | 960                  | 101.44               |
| Standard 9 | 1:20     | 50                | 950                  | 126.8                |

**Supplementary Table 4a.** Standard dilutions for the IL-6 assay.

| Number | V(ELISA assay buffer) (μl) | V (standard) (μL) | IL-6 concentration (pg/mL) |
|--------|----------------------------|-------------------|----------------------------|
| 1      | 350 (for 3 blanks)         | 0                 | 0                          |
| 2      | 475                        | 25 (5000 pg/mL)   | 250                        |
| 3      | 250                        | 250 std 2         | 125                        |
| 4      | 250                        | 250 std 3         | 62,5                       |
| 5      | 250                        | 250 std 4         | 31,2                       |
| 6      | 250                        | 250 std 5         | 15,6                       |
| 7      | 250                        | 250 std 6         | 7,8                        |
| 8      | 250                        | 250 std 7         | 3,9                        |

**Supplementary Table 4b.** Standard dilutions for the IL-8 assay.

| Number | V(ELISA/ELISPOT diluent) (μL) | V (standard) (μl) | IL8 concentration (pg/mL) |
|--------|-------------------------------|-------------------|---------------------------|
| 1      | 0                             | 120 stock         | 250                       |
| 2      | 120                           | 120 μL std 1      | 125                       |
| 3      | 120                           | 120 μL std 2      | 62.5                      |
| 4      | 120                           | 120 μL std 3      | 31.2                      |
| 5      | 120                           | 120 μL std 4      | 15.6                      |
| 6      | 120                           | 120 μL std 5      | 7.8                       |
| 7      | 120                           | 120 μL std 6      | 3.9                       |
| Blank  | 120                           | 0                 | 0                         |

**Supplementary Table 5.** Standard dilutions for the MDA assay.

| Tube | MDA 25 μM (μL) | Water (μL) | MDA concentration (μM) |
|------|----------------|------------|------------------------|
| A    | 0              | 500        | 0                      |
| B    | 2.5            | 498        | 0.125                  |
| C    | 5              | 495        | 0.25                   |
| D    | 10             | 490        | 0.5                    |
| E    | 20             | 480        | 1                      |
| F    | 50             | 450        | 2.5                    |
| G    | 100            | 400        | 5                      |
| H    | 200            | 300        | 10                     |
| I    | 400            | 100        | 20                     |

**Supplementary Table 6.** Standard dilutions for DNA/RNA oxidative damage assay.

| Number | V(ELISA Buffer) (μL) | V (standard) (μL) | concentration (pg/mL) |
|--------|----------------------|-------------------|-----------------------|
| 1      | 900                  | 100 (30 ng/mL)    | 3000                  |
| 2      | 500                  | 400 std 1         | 1333                  |
| 3      | 500                  | 400 std 2         | 592.6                 |
| 4      | 500                  | 400 std 3         | 263.4                 |
| 5      | 500                  | 400 std 4         | 117.1                 |
| 6      | 500                  | 400 std 5         | 52                    |
| 7      | 500                  | 400 std 6         | 23.1                  |
| 8      | 500                  | 400 std 7         | 10.3                  |
